# Supplementary material
Source: PubMed Central journal article supplement (PMC2042157)

# Remembered > Forgotten Sentences (light sedation)

(a)

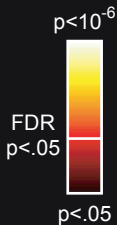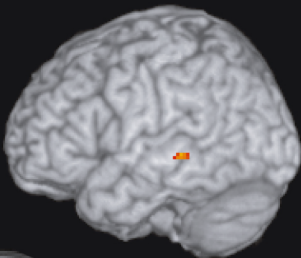

(b)

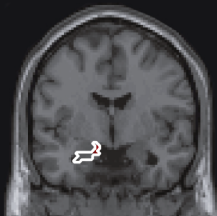

Left Anterior Hippocampus  
Search Volume

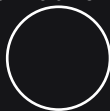

Supplement: pnas_0701309104_2.pdf [file pnas_0701309104_2.pdf]
